# Supplementary material for: High-throughput functional assay in cystic fibrosis patient-derived organoids allows drug repurposing
Source: PubMed Central journal article supplement — ERJ Open Res. 2023 Jan 30;9(1):00495-2022. doi: 10.1183/23120541.00495-2022 (PMC9885274; doi:10.1183/23120541.00495-2022), 2023-01-30
Supplement: 00495-2022.SUPPLEMENT.pdf [file 00495-2022.SUPPLEMENT.pdf]

**Supplementary Table 1. List of 43 compounds excluded for further screening, based on toxicity assay.**

| Compound number | Compound name                                               | In vivo application                          |
|-----------------|-------------------------------------------------------------|----------------------------------------------|
| 1               | ABT-263 (Navitoclax)                                        | Anti-cancer drug                             |
| 2               | YM155 (Sepantronium Bromide)                                | Anti-cancer drug                             |
| 3               | Bortezomib (PS-341)                                         | Anti-cancer drug                             |
| 4               | Panobinostat (LBH589)                                       | Anti-cancer drug                             |
| 5               | CEP-18770 (Delanzomib)                                      | Anti-cancer drug                             |
| 6               | 17-AAG (Tanespimycin)                                       | Anti-cancer drug                             |
| 7               | Ganetespib (STA-9090)                                       | Anti-cancer drug                             |
| 8               | Saracatinib (AZD0530)                                       | Anti-cancer drug                             |
| 9               | Onalespib (AT13387)                                         | Anti-cancer drug                             |
| 10              | Dasatinib (BMS-354825)                                      | Anti-cancer drug                             |
| 11              | Docetaxel (RP56976)                                         | Anti-cancer drug                             |
| 12              | Ispinesib (SB-715992)                                       | Anti-cancer drug                             |
| 13              | Paclitaxel (NSC 125973)                                     | Anti-cancer drug                             |
| 14              | Rigosertib (ON-01910)                                       | Anti-cancer drug                             |
| 15              | Epothilone B (EPO906, Patupilone)                           | Anti-cancer drug                             |
| 16              | Flavopiridol (Alvocidib)                                    | Anti-cancer drug                             |
| 17              | Topotecan (NSC609699) HCl                                   | Anti-cancer drug                             |
| 18              | Epirubicin (IMI 28) HCl                                     | Anti-cancer drug                             |
| 19              | Tamoxifen (ICI 46474)                                       | Anti-cancer drug                             |
| 20              | Vincristine (NSC-67574)                                     | Anti-cancer drug                             |
| 21              | Rufinamide                                                  | Anti-epileptic/seizure drugs                 |
| 22              | Volasertib (BI 6727)                                        | Anti-cancer drug                             |
| 23              | Neratinib (HKI-272)                                         | Anti-cancer drug / Inhibits Xenograph growth |
| 24              | Ixazomib (MLN2238)                                          | Anti-cancer drug                             |
| 25              | Crystal Violet                                              | triarylmethane dye                           |
| 26              | Omipalisib (GSK2126458, GSK458)                             | Anti-cancer drug                             |
| 27              | Carfilzomib (PR-171)                                        | Anti-cancer drug                             |
| 28              | Daunorubicin (RP 13057) HCl                                 | Anti-cancer drug                             |
| 29              | Cabazitaxel (XRP6258)                                       | Anti-cancer drug                             |
| 30              | Bisacodyl                                                   | Laxative drug                                |
| 31              | Dinaciclib (SCH727965)                                      | Anti-cancer drug                             |
| 32              | Vinorelbine Tartrate                                        | Anti-cancer drug                             |
| 33              | Digoxin                                                     | Atrial fibrillation and heart failure drug   |
| 34              | Puromycin (CL13900) 2HCl                                    | Aminonucleoside antibiotic                   |
| 35              | Vinblastine (NSC-49842) sulfate                             | Anti-cancer drug                             |
| 36              | Birinapant (TL32711)                                        | Anti-cancer drug                             |
| 37              | Dasatinib Monohydrate                                       | Anti-cancer drug                             |
| 38              | Docetaxel Trihydrate                                        | Anti-cancer drug                             |
| 39              | Riociguat (BAY 63-2521)                                     | Pulmonary hypertension drug                  |
| 40              | Mebendazole                                                 | Anthelmintic drug                            |
| 41              | Gemcitabine (LY-188011) HCl                                 | Anti-cancer drug                             |
| 42              | Vancomycin HCl                                              | Antibacterial agent                          |
| 43              | Fosbretabulin (Combretastatin A4 Phosphate (CA4P)) Disodium | Anti-cancer drug                             |

**Supplementary Table 2. List of p-values and adjusted p-valued (Benjamin-Hochberg method) of top 40 compound combinations in the W1282X/W1282X screen, based on a one-sided T-test where the average AUC value per condition over the 4 donors was compared to the average of the plate.**

| Compound_ID          | p        | p_adjusted | Compound 1                     | Compound 2                   |
|----------------------|----------|------------|--------------------------------|------------------------------|
| Pos. Control plate A | 0        | 0          |                                |                              |
| Pos. Control plate B | 0        | 0          |                                |                              |
| 1                    | 0.000341 | 0.084206   | Fenspiride HCl (S4090)         | Mevastatin (S4223)           |
| 2                    | 0.000683 | 0.126271   | Pitavastatin Calcium (S1759)   | Alibendol (S1928)            |
| 3                    | 0.002352 | 0.348096   | Simvastatin                    | Tamoxifen Citrate (S1972)    |
| 4                    | 0.003027 | 0.365673   | CO-1686 (AVL-301)              | Palbociclib (PD-0332991) HCl |
| 5                    | 0.003459 | 0.365673   | Valsartan (S1894)              | Lovastatin (S2061)           |
| 6                    | 0.008797 | 0.758291   | Guaifenesin (S1740)            | Fluvastatin Sodium (S1909)   |
| 7                    | 0.010058 | 0.758291   | Nilotinib (AMN-107)            | Dienogest                    |
| 8                    | 0.010525 | 0.758291   | Carvedilol                     | Formoterol Hemifumarate      |
| 9                    | 0.016278 | 0.758291   | Butoconazole nitrate           | Ketotifen Fumarate           |
| 10                   | 0.017213 | 0.758291   | Droperidol                     | Fluorometholone Acetate      |
| 11                   | 0.017866 | 0.758291   | Sotrastaurin                   | Ethinodiol diacetate         |
| 12                   | 0.018242 | 0.758291   | Linezolid                      | Acetylcysteine               |
| 13                   | 0.020269 | 0.758291   | S- (+)-Rolipram (S2127)        | Naphazoline HCl (S2519)      |
| 14                   | 0.022949 | 0.758291   | Varlitinib                     | Entacapone                   |
| 15                   | 0.0233   | 0.758291   | Cabazitaxel                    | Pergolide mesylate           |
| 16                   | 0.025466 | 0.758291   | Pravastatin sodium             | Mirabegron                   |
| 17                   | 0.025704 | 0.758291   | Voxtalisib (XL765, SAR245409)  | L-Glutamine                  |
| 18                   | 0.026123 | 0.758291   | Levobupivacaine HCl            | Chlorquinaldol               |
| 19                   | 0.026898 | 0.758291   | Idasanutlin (RG-7388)          | Lypressin Acetate            |
| 20                   | 0.031113 | 0.758291   | Cobicistat (GS-9350)           | Eletriptan HBr               |
| 21                   | 0.031239 | 0.758291   | Triciribine                    | Cilostazol                   |
| 22                   | 0.03282  | 0.758291   | Rosuvastatin Calcium           | Secnidazole                  |
| 23                   | 0.033328 | 0.758291   | Foretinib (GSK1363089)         | Cilnidipine                  |
| 24                   | 0.033605 | 0.758291   | TH-302                         | Estradiol valerate           |
| 25                   | 0.035348 | 0.758291   | Cilengitide                    | Empty                        |
| 26                   | 0.035555 | 0.758291   | Sofosbuvir (PSI-7977, GS-7977) | Sertaconazole nitrate        |
| 27                   | 0.037549 | 0.758291   | Probucof                       | Spectinomycin HCl            |
| 28                   | 0.038516 | 0.758291   | Marbofloxacin                  | Monobenzene                  |
| 29                   | 0.041068 | 0.758291   | Griseofulvin                   | Florfenicol                  |
| 30                   | 0.041323 | 0.758291   | Lomerizine HCl                 | Amoxapine                    |
| 31                   | 0.041537 | 0.758291   | VX-680 (Tozasertib, MK-0457)   | Celecoxib                    |
| 32                   | 0.04302  | 0.758291   | Edoxaban                       | Nafarelin Acetate            |
| 33                   | 0.044306 | 0.758291   | Bendamustine HCl               | Omeprazole                   |
| 34                   | 0.046228 | 0.758291   | Licofelone                     | Sulfadoxine                  |
| 35                   | 0.046428 | 0.758291   | Albendazole Oxide              | Diclazuril                   |
| 36                   | 0.047365 | 0.758291   | KPT-330                        | Oxytocin (Syntocinon)        |
| 37                   | 0.048372 | 0.758291   | Retapamulin                    | Tiratricol                   |
| 38                   | 0.049341 | 0.758291   | Sorafenib Tosylate             | Rufinamide                   |
